# Supplementary material
Source: HighWire-hosted journal article supplement (https://www.jneurosci.org/content/38/8/2094)
Supplement: inline-supplementary-material-1 [file inline-supplementary-material-1.xlsx]

## Sheet: Sheet1
		Behavior						Neurometric (scaled to 1000 neurons)
Mouse	Type	Toff (%)	Toff (%)	Ton (%)	Ton (%)	Ichange	I	Toff (%)	Toff (%)	Ton (%)	Ton (%)	Ichange	I	Neurons
1	PV-Arch	21.5	1.7	22	2	0	0.06	4	0.2	5.7	0.2	0.17	0.02	42
2	PV-ChR2	16.2	0.3	4.7	0.1	-0.53	0.07	4.94	0.06	2.96	0.06	-0.25	0.02	104
3	PV-ChR2	22	4	6	1.7	-0.54	0.11	5.4	0.3	4	0.3	-0.14	0.06	16
4	PV-ChR2	13.7	1.5	4	3	-0.54	0.3	13.9	0.5	6.6	0.5	-0.34	0.04	20
5	PV-ChR2	16.7	1.6	3.6	0.2	-0.63	0.03	4.9	0.2	5.5	0.2	0.06	0.03	24
6	PV-ChR2	5.6	1.1	2.5	0.5	-0.38	0.11	5.1	0.2	4.6	0.2	-0.05	0.03	25
7	PV-Arch	3.7	0.4	19	2	0.66	0.04	4.8	0.3	5.4	0.3	0.05	0.03	25
8	PV-Arch	14.1	0.9	16.9	9	0.08	0.04	7.7	0.3	8.9	0.3	0.07	0.02	23
9	Pyr-ChR2	5.6	1.1	4.9	0.4	-0.06	0.1	5.2	0.3	4.4	0.3	-0.08	0.04	19
10	Pyr-ChR2	6.8	0.9	3.2	0.5	-0.35	0.09	5.2	0.3	3.3	0.3	-0.21	0.06	16
11	Pyr-ChR2	0.7	1.9	11	2	0.18	0.15	5.8	0.4	7.9	0.4	0.15	0.03	23
12	Pyr-ChR2	2	0.01	3.4	0.3	0.26	0.04	3.1	0.3	3.9	0.3	0.11	0.04	26
13	Pyr-ChR2	3.1	0.6	5.6	0.9	0.28	0.11	4.2	0.2	4.7	0.2	0.05	0.03	43
14	PV-ChR2	3.2	0.3	3.2	0.4	-0.01	0.07	4.2	0.3	4.3	0.3	0.02	0.04	34
15	PV-ChR2	5.5	1.6	3.9	1.5	-0.16	0.23	6.4	0.4	3.4	0.4	-0.3	0.06	16
16	PV-ChR2	9.6	1.9	10.2	0.7	0.03	0.1	4.3	0.2	3.5	0.2	-0.11	0.04	14
17	PV-ChR2	2	0.4	2.6	1.5	0.13	0.3	3.6	0.2	4.3	0.2	0.1	0.04	15
18	PV-ChR2	7.6	1.4	9.5	0.4	0.1	0.09	4.3	0.2	3.9	0.2	-0.05	0.03	22
19	PV-ChR2	8.3	0.5	8.4	0.8	0.01	0.05	5.5	0.3	5.6	0.3	0.01	0.05	39
